# Supplementary material for: Long-read RNA sequencing reveals widespread sex-specific alternative splicing in threespine stickleback fish
Source: HighWire-hosted journal article supplement (doi:10.1101/gr.274282.120), 2021-06-15
Supplement: Supplemental_material.zip [file Supplemental_Table_S1.xlsx]

## Sheet: Sheet1
Supplemental Table S1: Sequencing statistics for each sample and combined analysis
Single Samples	No. SMRT cells used	Data produced (Gigabytes)	No. of subreads	No. of ccs reads	% of reads passing LIMA filters	No. of polished high quality (hq) reads	No. of polished low quality reads
Female Liver	2	83	64388097	793097	0.78	20883	1094
Male Liver	2	66	49504710	531387	0.68	19217	971
Female Brain	2	31	17737503	211976	0.68	11520	442
Male Brain	2	51	24092574	378833	0.68	19242	633
Female Pronephros	2	135	72725642	1113857	0.81	105759	829
Male Pronephros	2	126	58309289	1154604	0.81	104786	1038
Ovary	2	31	15733152	191141	0.69	13332	206
Testis	2	60	20077039	569174	0.73	38077	345
Combined Samples
All samples	16	583	322568006	4944069	0.76	304169	6462
All female samples	8	280	170584394	2310071	0.78	153224	2822
All male samples	8	303	151983612	2633998	0.75	179206	3429
All somatic female samples	6	249	154851242	2118930	0.79	140067	2555
All somatic male samples	6	243	131906573	2064824	0.75	144712	2927
