# Supplementary material for: Long-read RNA sequencing reveals widespread sex-specific alternative splicing in threespine stickleback fish
Source: HighWire-hosted journal article supplement (doi:10.1101/gr.274282.120), 2021-06-15
Supplement: Supplemental_material.zip [file Supplemental_Table_S2.xlsx]

## Sheet: Sheet1
Supplemental Table S2. Isoform counts among transcriptomes
Transcriptome	Gene Count	Isoform Count
Isoseq Transcriptome	13703	26432
Female Transcriptome	7299	11653
Male Transcriptome	8223	14068
Somatic Female Transcriptome	6643	10571
Somatic Male Transcriptome	7177	11432
Female Brain Transcriptome	1282	1355
Male Brain Transcriptome	2244	2482
Female Liver Transcriptome	1684	2139
Male Liver Transcriptome	1323	1600
Female Pronephros Transcriptome	5120	8177
Male Pronephros Transcriptome	5251	8679
Ovary Transcriptome	2017	2216
Testis Transcriptome	3773	5174
