# Supplementary material for: Long-read RNA sequencing reveals widespread sex-specific alternative splicing in threespine stickleback fish
Source: HighWire-hosted journal article supplement (doi:10.1101/gr.274282.120), 2021-06-15
Supplement: Supplemental_material.zip [file Supplemental_Table_S3.xlsx]

## Sheet: Sheet1
Supplemental Table S3. Number of reads obtained from short read Illumina sequencing
Sample	Total reads sequenced
Female Liver	180797305
Male Liver	179733690
Female Brain	156991391
Male Brain	161875572
Female Pronephros	156866627
Male Pronephros	164180908
Ovary	170567247
Testis	160639134
