# Supplementary material for: Long-read RNA sequencing reveals widespread sex-specific alternative splicing in threespine stickleback fish
Source: HighWire-hosted journal article supplement (doi:10.1101/gr.274282.120), 2021-06-15
Supplement: Supplemental_material.zip [file Supplemental_Table_S4.xlsx]

## Sheet: Sheet1
Supplemental Table S4. Breakdown of isoforms per chromosome
Chromosome	Ensembl Genome Assembly	V5 genome assembly
1	1440	1578
2	1092	1110
3	1224	1293
4	1603	1732
5	824	982
6	937	968
7	1658	1855
8	1281	1312
9	1303	1330
10	969	1134
11	1368	1430
12	1185	1321
13	1220	1267
14	953	1043
15	1006	1064
16	882	964
17	893	1404
18	1023	998
20	1178	1226
21	495	634
M	27	26
Unknown/Scaffolds	2746	512
X	1125	1142
Y	n/a	962
