# Supplementary material for: Long-read RNA sequencing reveals widespread sex-specific alternative splicing in threespine stickleback fish
Source: HighWire-hosted journal article supplement (doi:10.1101/gr.274282.120), 2021-06-15
Supplement: Supplemental_material.zip [file Supplemental_Table_S5.xlsx]

## Sheet: Sheet1
Supplemental Table S5. Significantly enriched GO terms for novel isoforms
GO Term	Pvalue	Number of Occurrences
GO:0006741	0	2
GO:0043161	0	4
GO:0006685	0	1
GO:0071821	0	3
GO:0034453	0	3
GO:0042128	0	2
GO:0009263	0	6
GO:0006958	0	6
GO:0016480	0	8
GO:0017053	0	5
GO:0006108	0	3
GO:0000124	0	9
GO:0007214	0	1
GO:0031209	0	1
GO:0004657	0	4
GO:0000256	0	4
GO:0051879	0	1
GO:0097027	0	11
GO:0005070	0	11
GO:0006622	0	3
GO:0005525	0	278
GO:0008649	0	2
GO:0004146	0	1
GO:0008321	0	1
GO:0004047	0	1
GO:0004419	0	2
GO:0004037	0	4
GO:0005092	0	3
GO:0006662	0	2
GO:0005852	0	11
GO:0000244	0	5
GO:0007249	0	3
GO:1905515	0	6
GO:0004962	0	3
GO:0004022	0	1
GO:0016192	0	99
GO:0004066	0	3
GO:0050819	0	5
GO:0007029	0	1
GO:0044571	0	4
GO:0070365	0	3
GO:0043484	0	7
GO:0003743	0	40
GO:0048678	0	1
GO:0016651	0	11
GO:0000811	0	1
GO:0002949	0	1
GO:0015321	0	1
GO:0033743	0	4
GO:0007217	0	1
GO:0008180	0	15
GO:0018400	0	1
GO:0006614	0	18
GO:0097367	0	2
GO:0033014	0	12
GO:0090156	0	1
GO:2000772	0	1
GO:0017119	0	9
GO:0050900	0	4
GO:0021954	0	2
GO:0001671	0	4
GO:0050661	0	34
GO:0048188	0	11
GO:0033588	0	3
GO:0004523	0	17
GO:0043966	0	2
GO:0006529	0	3
GO:0060262	0	5
GO:0007017	0	35
GO:0004591	0	5
GO:0070273	0	16
GO:0004491	0	2
GO:0004190	0	30
GO:0016773	0	21
GO:0006707	0	8
GO:0006562	0	4
GO:0019885	0	5
GO:0000784	0	9
GO:0035102	0	4
GO:0005506	0	144
GO:0046578	0	2
GO:0004014	0	1
GO:0006750	0	8
GO:0005778	0	3
GO:0008273	0	1
GO:0003081	0	3
GO:0016868	0	11
GO:0003983	0	2
GO:0008235	0	11
GO:0004360	0	2
GO:0001164	0	5
GO:0017110	0	2
GO:0050023	0	2
GO:0030242	0	2
GO:0008452	0	3
GO:0006367	0	10
GO:0016580	0	3
GO:0034464	0	7
GO:0004743	0	12
GO:0005978	0	14
GO:0007051	0	1
GO:0001188	0	5
GO:0052725	0	3
GO:0045239	0	2
GO:0004844	0	1
GO:0003998	0	1
GO:0006658	0	6
GO:0004571	0	15
GO:0015910	0	3
GO:0005814	0	5
GO:0045056	0	1
GO:0030168	0	9
GO:0016639	0	5
GO:0004815	0	2
GO:0004489	0	2
GO:0019956	0	2
GO:0042577	0	3
GO:0055088	0	3
GO:0071586	0	3
GO:0006360	0	5
GO:0031858	0	2
GO:0004148	0	4
GO:0005890	0	4
GO:0016717	0	3
GO:0019867	0	2
GO:0061608	0	5
GO:0031982	0	5
GO:0006596	0	14
GO:0007021	0	1
GO:0004332	0	6
GO:0031201	0	2
GO:0001540	0	1
GO:0051082	0	43
GO:0003725	0	3
GO:0016409	0	10
GO:0005484	0	14
GO:0043065	0	10
GO:0016429	0	2
GO:1901135	0	2
GO:0006516	0	4
GO:0007163	0	3
GO:0016615	0	3
GO:0008556	0	12
GO:0042289	0	2
GO:0004563	0	2
GO:0001085	0	2
GO:0006986	0	1
GO:0017025	0	7
GO:0009264	0	6
GO:0006415	0	5
GO:0005523	0	3
GO:0030308	0	1
GO:0046600	0	5
GO:0071013	0	4
GO:0017069	0	2
GO:0043231	0	4
GO:0042030	0	1
GO:0008378	0	20
GO:0018279	0	2
GO:0008312	0	16
GO:0004651	0	1
GO:0004579	0	1
GO:0005763	0	4
GO:0009267	0	1
GO:0052726	0	3
GO:0016581	0	6
GO:0005869	0	4
GO:0005975	0	118
GO:0016844	0	3
GO:0004336	0	13
GO:0070403	0	14
GO:1990426	0	1
GO:0003676	0	497
GO:0051694	0	3
GO:0005846	0	1
GO:0015986	0	14
GO:0006801	0	4
GO:0006012	0	2
GO:0070897	0	8
GO:0042578	0	12
GO:0002250	0	7
GO:1901031	0	3
GO:0016702	0	47
GO:0006147	0	6
GO:0006683	0	13
GO:0019229	0	1
GO:0006269	0	2
GO:0045292	0	1
GO:0019904	0	32
GO:0008478	0	2
GO:0032008	0	8
GO:0004617	0	1
GO:1904668	0	11
GO:0034128	0	1
GO:0030955	0	12
GO:0017057	0	2
GO:0034314	0	36
GO:0036055	0	5
GO:0035145	0	1
GO:0055070	0	1
GO:0035240	0	1
GO:0070530	0	1
GO:0043039	0	12
GO:0004807	0	3
GO:0030833	0	31
GO:0099106	0	1
GO:0035226	0	3
GO:0006672	0	8
GO:0030001	0	26
GO:0019843	0	6
GO:0004357	0	5
GO:0031105	0	15
GO:0005764	0	21
GO:0004829	0	10
GO:0005544	0	31
GO:0051382	0	5
GO:0004576	0	3
GO:0000775	0	2
GO:0032780	0	1
GO:0050776	0	14
GO:0046961	0	8
GO:0008175	0	3
GO:0071816	0	3
GO:0008217	0	8
GO:0005579	0	5
GO:1902979	0	1
GO:0004663	0	2
GO:0006556	0	14
GO:0030203	0	5
GO:0019243	0	2
GO:0070006	0	13
GO:0008384	0	6
GO:0030234	0	6
GO:0047325	0	3
GO:0006098	0	30
GO:0008449	0	5
GO:0019674	0	2
GO:0048513	0	3
GO:0042162	0	9
GO:0004587	0	1
GO:0016593	0	7
GO:0017134	0	3
GO:0010038	0	2
GO:0000012	0	1
GO:0007624	0	1
GO:0006044	0	1
GO:0016494	0	3
GO:1902445	0	2
GO:0003913	0	1
GO:0004467	0	5
GO:0006096	0	50
GO:0000930	0	4
GO:0004748	0	4
GO:0070286	0	3
GO:0070776	0	2
GO:0008410	0	2
GO:0006891	0	5
GO:0000123	0	9
GO:0003747	0	5
GO:0007339	0	17
GO:0000470	0	1
GO:0035803	0	17
GO:0008191	0	6
GO:0004861	0	5
GO:0070976	0	2
GO:0005964	0	10
GO:0003844	0	4
GO:0018344	0	2
GO:0030279	0	1
GO:0035267	0	12
GO:0030576	0	1
GO:0004478	0	14
GO:0055114	0	503
GO:0004869	0	12
GO:0004017	0	6
GO:0007015	0	12
GO:0005777	0	14
GO:0016811	0	7
GO:0000462	0	2
GO:0045261	0	10
GO:0090482	0	2
GO:0000439	0	6
GO:0004619	0	3
GO:0019799	0	3
GO:0006370	0	3
GO:0033961	0	10
GO:0030041	0	12
GO:0016570	0	7
GO:0031463	0	4
GO:0006807	0	18
GO:0006597	0	6
GO:0046785	0	2
GO:0070552	0	2
GO:0004185	0	13
GO:0043004	0	4
GO:0003870	0	8
GO:0080009	0	12
GO:0003824	0	394
GO:0016558	0	2
GO:0016592	0	31
GO:0005669	0	15
GO:0031390	0	1
GO:0016435	0	4
GO:1901137	0	2
GO:0004377	0	2
GO:0046933	0	14
GO:0004512	0	4
GO:0015173	0	6
GO:0042978	0	10
GO:0005093	0	3
GO:0000172	0	1
GO:0098519	0	1
GO:0003906	0	1
GO:0014066	0	1
GO:0009636	0	2
GO:0008022	0	2
GO:0072487	0	4
GO:0005925	0	14
GO:0043461	0	2
GO:0016706	0	12
GO:0032509	0	3
GO:0007031	0	2
GO:0015349	0	7
GO:0007265	0	5
GO:0006886	0	94
GO:0008609	0	3
GO:0016175	0	20
GO:0016603	0	2
GO:0004348	0	3
GO:0051180	0	2
GO:0016705	0	105
GO:0046907	0	12
GO:0009235	0	2
GO:0005858	0	2
GO:0004484	0	3
GO:0006106	0	2
GO:0003873	0	10
GO:0004985	0	8
GO:0000038	0	1
GO:0048251	0	3
GO:0003924	0	196
GO:0008308	0	10
GO:0007034	0	19
GO:0033781	0	8
GO:0006884	0	8
GO:0035804	0	17
GO:0030574	0	4
GO:0047429	0	8
GO:0000783	0	2
GO:0008184	0	18
GO:0034472	0	5
GO:0001401	0	9
GO:0000030	0	3
GO:0006542	0	6
GO:0042147	0	7
GO:0007050	0	6
GO:0006904	0	22
GO:0019789	0	8
GO:0009165	0	5
GO:0070531	0	2
GO:0032049	0	3
GO:0031519	0	4
GO:0006665	0	25
GO:0046626	0	1
GO:0008121	0	1
GO:0006869	0	83
GO:0047389	0	7
GO:0006959	0	7
GO:0046475	0	7
GO:0015629	0	40
GO:0071157	0	13
GO:0070187	0	2
GO:0004590	0	3
GO:0000175	0	4
GO:0004749	0	5
GO:0051998	0	5
GO:0003863	0	3
GO:0006422	0	2
GO:0008444	0	3
GO:0003854	0	4
GO:0004719	0	7
GO:0004046	0	3
GO:0002953	0	1
GO:0030170	0	55
GO:0004476	0	3
GO:0070876	0	1
GO:0001578	0	4
GO:0003999	0	1
GO:0072544	0	1
GO:0008418	0	6
GO:0008442	0	3
GO:0010792	0	6
GO:0016180	0	2
GO:0080132	0	1
GO:0004499	0	2
GO:0004689	0	10
GO:0042138	0	1
GO:0050796	0	3
GO:0070569	0	4
GO:0038036	0	4
GO:0032480	0	1
GO:0006003	0	10
GO:0006363	0	1
GO:0035091	0	42
GO:0015075	0	7
GO:0019538	0	8
GO:0046695	0	9
GO:0070476	0	4
GO:0046654	0	2
GO:0034597	0	1
GO:0008097	0	6
GO:0016627	0	33
GO:0006546	0	1
GO:0006011	0	2
GO:0030837	0	4
GO:0007131	0	1
GO:0016538	0	11
GO:0009086	0	5
GO:0006431	0	1
GO:0006094	0	20
GO:0005047	0	7
GO:2000574	0	8
GO:0002151	0	4
GO:0004616	0	19
GO:0030992	0	2
GO:0015991	0	16
GO:0030298	0	1
GO:0030880	0	1
GO:0070915	0	3
GO:0044205	0	3
GO:0008278	0	4
GO:0043269	0	1
GO:0030126	0	5
GO:0019815	0	2
GO:0006606	0	13
GO:0006625	0	2
GO:0006907	0	7
GO:0031072	0	13
GO:0006488	0	1
GO:0070327	0	1
GO:0007276	0	11
GO:0004416	0	2
GO:0032559	0	8
GO:0005518	0	2
GO:0007020	0	6
GO:0097255	0	6
GO:0016493	0	1
GO:0004645	0	15
GO:0019902	0	3
GO:0043141	0	6
GO:0004325	0	1
GO:0004356	0	8
GO:0031071	0	4
GO:0004722	0	22
GO:0030091	0	4
GO:0006207	0	5
GO:0006308	0	10
GO:0089701	0	3
GO:0004799	0	3
GO:0000340	0	5
GO:0003847	0	12
GO:0003956	0	1
GO:0070373	0	1
GO:0009058	0	32
GO:0000179	0	2
GO:0015165	0	26
GO:0016485	0	4
GO:0072331	0	2
GO:1904263	0	4
GO:0006635	0	8
GO:0003997	0	7
GO:0031464	0	5
GO:0004342	0	1
GO:0003896	0	2
GO:0020037	0	113
GO:0000154	0	2
GO:0070682	0	2
GO:0006000	0	13
GO:0004767	0	1
GO:0036402	0	7
GO:0004825	0	1
GO:0070860	0	5
GO:0004560	0	5
GO:0004535	0	3
GO:0008047	0	4
GO:0006435	0	10
GO:0044341	0	1
GO:0004631	0	1
GO:0046034	0	11
GO:0004978	0	1
GO:0036054	0	5
GO:0006231	0	3
GO:1990456	0	1
GO:0004333	0	2
GO:0045670	0	7
GO:0008892	0	6
GO:0006996	0	5
GO:0005786	0	7
GO:0004992	0	1
GO:0004471	0	6
GO:0071929	0	3
GO:0045663	0	2
GO:0016233	0	2
GO:0051016	0	15
GO:0070988	0	1
GO:0016521	0	2
GO:0006024	0	3
GO:0016857	0	4
GO:0003712	0	31
GO:0042754	0	2
GO:0032099	0	1
GO:0004454	0	3
GO:0034511	0	2
GO:0044233	0	1
GO:0000338	0	8
GO:0005885	0	36
GO:0097361	0	2
GO:0004359	0	5
GO:0009443	0	2
GO:0005674	0	1
GO:0015074	0	35
GO:0052855	0	1
GO:0009408	0	6
GO:0019901	0	6
GO:0005319	0	79
GO:0015858	0	5
GO:0016671	0	4
GO:0031957	0	5
GO:0010997	0	11
GO:0000276	0	2
GO:0032469	0	1
GO:0004955	0	1
GO:0016052	0	2
GO:0004347	0	20
GO:0006493	0	22
GO:0004812	0	35
GO:0004470	0	6
GO:0000381	0	12
GO:0004045	0	3
GO:0010941	0	1
GO:0035871	0	1
GO:0015245	0	5
GO:0003938	0	3
GO:0047150	0	5
GO:0005160	0	6
GO:0001682	0	1
GO:0001541	0	1
GO:0071704	0	6
GO:0090481	0	26
GO:0033179	0	5
GO:0006172	0	3
GO:0045815	0	3
GO:0071949	0	15
GO:0004559	0	4
GO:0003860	0	2
GO:0016776	0	3
GO:0016920	0	1
GO:0006457	0	51
GO:0005740	0	10
GO:0030942	0	7
GO:0031011	0	15
GO:0006238	0	1
GO:0008343	0	1
GO:0004588	0	2
GO:0016747	0	14
GO:0006006	0	15
GO:0003978	0	1
GO:0030131	0	25
GO:0003934	0	1
GO:0045089	0	1
GO:0048500	0	10
GO:0016742	0	1
GO:0030011	0	1
GO:0008276	0	2
GO:0004329	0	4
GO:0051424	0	1
GO:0006919	0	3
GO:0004345	0	15
GO:0016624	0	8
GO:0019509	0	2
GO:0004109	0	5
GO:0016153	0	5
GO:0030158	0	1
GO:0016560	0	3
GO:0003826	0	3
GO:0006013	0	4
GO:0016422	0	1
GO:0003857	0	5
GO:0006778	0	7
GO:0005779	0	6
GO:0005537	0	2
GO:0006168	0	1
GO:0016628	0	2
GO:0032957	0	3
