# Supplementary material for: Long-read RNA sequencing reveals widespread sex-specific alternative splicing in threespine stickleback fish
Source: HighWire-hosted journal article supplement (doi:10.1101/gr.274282.120), 2021-06-15
Supplement: Supplemental_material.zip [file Supplemental_Table_S6.xlsx]

## Sheet: Sheet1
Supplemental Table S6. Breakdown of sex-specific isoforms per chromosome
Chromosome	Female-specific alternatively spliced isoforms	Male-specific alternatively spliced isoforms
1	154	185
2	106	148
3	103	197
4	139	224
5	80	110
6	70	122
7	115	230
8	101	180
9	99	169
10	74	114
11	123	198
12	111	192
13	115	195
14	72	155
15	95	132
16	86	139
17	79	113
18	97	147
20	109	177
21	36	70
MT	350	6
Scaffolds	235	350
X	160	111
