# Supplementary material for: Long-read RNA sequencing reveals widespread sex-specific alternative splicing in threespine stickleback fish
Source: HighWire-hosted journal article supplement (doi:10.1101/gr.274282.120), 2021-06-15
Supplement: Supplemental_material.zip [file Supplemental_Table_S7.xlsx]

## Sheet: Sheet1
Supplemental Table S7. Number of sex-specfic isoforms due to alternative splicing
Organ	Alternative Splicing only	Alternate TSS/TTS	Both	Total Isoforms
Brain	130	21	25	176
Liver	144	38	30	212
Pronephros	1208	390	246	1844
Testis	343	280	164	787
Ovary	77	46	23	146
