# Supplementary material for: Long-read RNA sequencing reveals widespread sex-specific alternative splicing in threespine stickleback fish
Source: HighWire-hosted journal article supplement (doi:10.1101/gr.274282.120), 2021-06-15
Supplement: Supplemental_material.zip [file Supplemental_Table_S8.xlsx]

## Sheet: Sheet1
Supplemental Table S8. Breakdown of organ-specific isoforms
Organ	Total Isoforms	No. of Protein-coding genes	No. of Protein-coding isoforms	No. of ncRNAs	No. of lncRNAs
Brain	176	113	127	49	46
Liver	212	155	170	42	40
Pronephros	1844	788	1687	157	155
Ovary	146	120	125	21	21
Testis	787	560	766	21	20
