# Supplementary material for: Long-read RNA sequencing reveals widespread sex-specific alternative splicing in threespine stickleback fish
Source: HighWire-hosted journal article supplement (doi:10.1101/gr.274282.120), 2021-06-15
Supplement: Supplemental_material.zip [file Supplemental_Table_S9.xlsx]

## Sheet: Sheet1
Supplemental Table S9. Testis-specific isoforms with potential roles in meiosis and spermatogenesis.
Isoform
PB.3943.4
PB.10924.1
PB.15194.7
PB.3498.1
PB.3498.5
PB.8113.4
PB.5716.4
PB.9174.6
PB.6115.2
PB.6115.1
PB.17260.4
PB.221.5
PB.221.4
PB.4709.4
PB.4709.8
PB.7902.5
PB.7902.2
PB.2498.1
PB.17260.6
PB.16778.1
PB.16778.3
PB.16778.2
PB.16778.5
PB.16778.6
PB.16778.8
PB.8285.2
PB.14782.3
PB.10924.8
PB.10924.9
PB.10924.2
PB.10924.3
PB.3315.5
PB.2553.2
PB.16778.10
PB.14782.2
PB.6574.2
