# Supplementary material for: Long-read RNA sequencing reveals widespread sex-specific alternative splicing in threespine stickleback fish
Source: HighWire-hosted journal article supplement (doi:10.1101/gr.274282.120), 2021-06-15
Supplement: Supplemental_material.zip [file Supplemental_Table_S10.xlsx]

## Sheet: Sheet1
Supplemental Table S10. Distribution of Ovary and Testis specific isoforms across chromosoems
Chromosome	Ovary-specific alternatively spliced isoforms	Testis-specific alternatively spliced isoforms
1	12	29
2	11	37
3	11	52
4	8	49
5	11	24
6	5	18
7	5	50
8	5	39
9	7	35
10	7	25
11	7	39
12	5	41
13	9	43
14	2	33
15	6	30
16	4	26
17	9	17
18	3	26
20	4	38
21	4	19
M	1	0
Unknown/Scaffolds	1	87
X	8	30
Y	0	72
