# Supplementary material for: Long-read RNA sequencing reveals widespread sex-specific alternative splicing in threespine stickleback fish
Source: HighWire-hosted journal article supplement (doi:10.1101/gr.274282.120), 2021-06-15
Supplement: Supplemental_material.zip [file Supplemental_Table_S11.xlsx]

## Sheet: Sheet1
Supplemental Table S11. Testis-specific Y isoforms overlap with Ensembl annotations
Isoform	Overlapping Ensembl Transcript Annotation
PB.14.4	ENSGACT00000010616,ENSGACT00000010603,ENSGACT00000008083,ENSGACT00000008087,ENSGACT00000005690,ENSGACT00000005676,ENSGACT00000005682,ENSGACT00000005675,ENSGACT00000010646,ENSGACT00000011152,ENSGACT00000011143,ENSGACT00000011092,ENSGACT00000005547,ENSGACT00000011168
PB.29.7	ENSGACT00000013325
PB.29.8	ENSGACT00000013325
PB.36.1	ENSGACT00000005592,ENSGACT00000008411
PB.36.2	ENSGACT00000005592,ENSGACT00000008411
PB.46.1	ENSGACT00000005597,ENSGACT00000006339
PB.46.3	ENSGACT00000005597,ENSGACT00000006339
PB.51.1	ENSGACT00000010552,ENSGACT00000005713
PB.51.2	ENSGACT00000010552,ENSGACT00000005713
PB.51.8	ENSGACT00000010552,ENSGACT00000005713
PB.98.2	ENSGACT00000013058
PB.98.3	ENSGACT00000013058
PB.98.6	ENSGACT00000013058
PB.106.5	ENSGACT00000011723
PB.107.4	ENSGACT00000013552,ENSGACT00000007921
PB.116.2	ENSGACT00000012630,ENSGACT00000012928
PB.130.4	ENSGACT00000013224,ENSGACT00000010773,ENSGACT00000011189,ENSGACT00000004274,ENSGACT00000013446,ENSGACT00000005818,ENSGACT00000017919,ENSGACT00000017923
PB.137.3	ENSGACT00000013446
PB.137.4	ENSGACT00000013446
PB.137.5	ENSGACT00000013446
PB.148.9	ENSGACT00000013446,ENSGACT00000017908
PB.148.12	ENSGACT00000013446,ENSGACT00000017908
PB.163.1	ENSGACT00000018293,ENSGACT00000018296
PB.167.1	ENSGACT00000018333
PB.169.4	ENSGACT00000018367,ENSGACT00000018396
PB.169.5	ENSGACT00000018367,ENSGACT00000018396
PB.179.1	ENSGACT00000018607,ENSGACT00000018585
PB.193.1	ENSGACT00000005452,ENSGACT00000004276,ENSGACT00000011443
PB.205.2	ENSGACT00000010579,ENSGACT00000004136
PB.209.1	ENSGACT00000004130
PB.227.6	ENSGACT00000017823
PB.227.4	ENSGACT00000017823
PB.227.5	ENSGACT00000017823
PB.227.9	ENSGACT00000017823
PB.227.11	ENSGACT00000017823
PB.227.12	ENSGACT00000017823
PB.227.15	ENSGACT00000017823
PB.239.1	ENSGACT00000017673
PB.246.1	ENSGACT00000014689
PB.246.3	ENSGACT00000014689
PB.246.2	ENSGACT00000014689
PB.248.7	ENSGACT00000014702,ENSGACT00000014708
PB.251.3	ENSGACT00000014751
PB.255.5	ENSGACT00000014817
PB.264.3	ENSGACT00000018006,ENSGACT00000014909
PB.270.1	ENSGACT00000018006,ENSGACT00000017539,ENSGACT00000015021
PB.270.2	ENSGACT00000018006,ENSGACT00000017539,ENSGACT00000015021
PB.270.3	ENSGACT00000018006,ENSGACT00000017539,ENSGACT00000015021
PB.292.1	ENSGACT00000015258,ENSGACT00000015273
PB.292.3	ENSGACT00000015258,ENSGACT00000015273
PB.299.1	novel
PB.299.3	novel
PB.299.4	novel
PB.299.5	novel
PB.315.1	ENSGACT00000015740,ENSGACT00000015662,ENSGACT00000015670
PB.316.1	ENSGACT00000015740,ENSGACT00000015683
PB.317.2	ENSGACT00000015740,ENSGACT00000015690
PB.318.2	ENSGACT00000015740,ENSGACT00000015693
PB.321.1	ENSGACT00000015773
PB.322.2	ENSGACT00000015831
PB.322.5	ENSGACT00000015831
PB.333.4	ENSGACT00000011748,ENSGACT00000015990
PB.340.6	ENSGACT00000016046
PB.340.5	ENSGACT00000016046,ENSGACT00000016053
PB.356.1	ENSGACT00000016294
PB.356.4	ENSGACT00000016294
PB.362.1	ENSGACT00000016594
PB.369.1	ENSGACT00000016724,ENSGACT00000016730
PB.385.1	ENSGACT00000005258,ENSGACT00000016973,ENSGACT00000016976
PB.387.3	ENSGACT00000005258,ENSGACT00000017055,ENSGACT00000017060
PB.408.2	ENSGACT00000014524,ENSGACT00000014373,ENSGACT00000014389,ENSGACT00000014377,ENSGACT00000014380
PB.416.2	ENSGACT00000009167,ENSGACT00000009176,ENSGACT00000009195,ENSGACT00000009187
